# Supplementary material for: Analysis of Group ICA-Based Connectivity Measures from fMRI: Application to Alzheimer's Disease
Source: PubMed Central journal article supplement (PMC3511486; doi:10.1371/journal.pone.0049340), 2012-11-30
Supplement: pone.0049340.s001.pdf [file pone.0049340.s001.pdf]

## Supporting Information Legends

### Estimating Number of Principal Components

The spectral decomposition yields a parsimonious expansion of the subject level functions  $A_{iq}(t) = \sum_{j=1}^{\infty} \xi_{ijq} \psi_{jq}(t)$ . Necessarily, we truncate the decomposition at  $L$  terms so that  $A_{iq}(t)$  has a finite decomposition expression,  $A_{iq}(t) = \sum_{j=1}^L \xi_{ijq} \psi_{jq}(t)$ .

We follow the approach proposed by [?] to estimate  $L$  based on proportion of variance explained. Let  $P_1$  and  $P_2$  be two thresholds, and define

$$L_q = \min\{k : \sum_{j=1}^k \lambda_{jq} / \sum_{j'=1}^{\infty} \lambda_{j'q} \geq P_1, \lambda_{kq} < P_2\}.$$

Here,  $P_1$  is a threshold on the cumulative explained variance while  $P_2$  is a threshold on the individual explained variance. In this manuscript, we choose  $P_1 = 0.95$  and  $P_2 = 0.02$ . These choices work well in our simulations and application. However, they should be carefully tuned in other settings, perhaps using simulations.

### Variance Matrix Smoothing

Instead of the true mixing matrix functions,  $A_{iq}(t)$ , we obtain the model-based estimates from the ICA algorithm,  $\hat{A}_{iq}(t)$ . Assume a measurement error model so that  $\hat{A}_{iq}(t) = A_{iq}(t) + \epsilon_{iq}(t)$ , where  $\epsilon_i(t)$  is a white noise process with variance  $\sigma_q^2$ . Thus a smoothing step is desirable.

Under the assumed model  $\hat{A}_{iq}(t) = A_{iq}(t) + \epsilon_{iq}(t)$ , the covariance operator for the observed data is  $K_q^W(s, t) = K_q(s, t) + \sigma_q^2 \delta_{ts}$ , where  $K_q^W(s, t) = \text{Cov}\{\hat{A}_{iq}(s), \hat{A}_{iq}(t)\}$  and  $\delta_{ts} = 1$  if  $t = s$  and 0 otherwise [?]. This equation reveals that the diagonal elements of  $K_q^W(s, t)$  includes the nugget measurement error. A simple and natural solution is to drop the diagonal elements and smooth the covariance matrix. We use the standard (moment based) estimate  $\hat{K}_q^W(s, t)$  from the observed data,  $\sum_{i=1}^I \hat{A}_{iq}(t) \hat{A}_{iq}(s) / I$  and then estimate  $\hat{K}^A(s, t)$  by smoothing the estimate for  $s \neq t$  [?, ?]. The eigenvalues,  $\lambda_{jq}$ , and eigenfunctions,  $\psi_{jq}$  can then be derived from this estimated covariance matrix.
